# Supplementary material for: The Impact of Case Diagnosis Coverage and Diagnosis Delays on the Effectiveness of Antiviral Strategies in Mitigating Pandemic Influenza A/H1N1 2009
Source: PubMed Central journal article supplement (PMC2972206; doi:10.1371/journal.pone.0013797), 2010-11-03

The Impact of Case Diagnosis Ratio and Diagnosis Delays on the Effectiveness of Antiviral Strategies in Mitigating Pandemic Influenza A/H1N1 2009

Support Information Figure S1

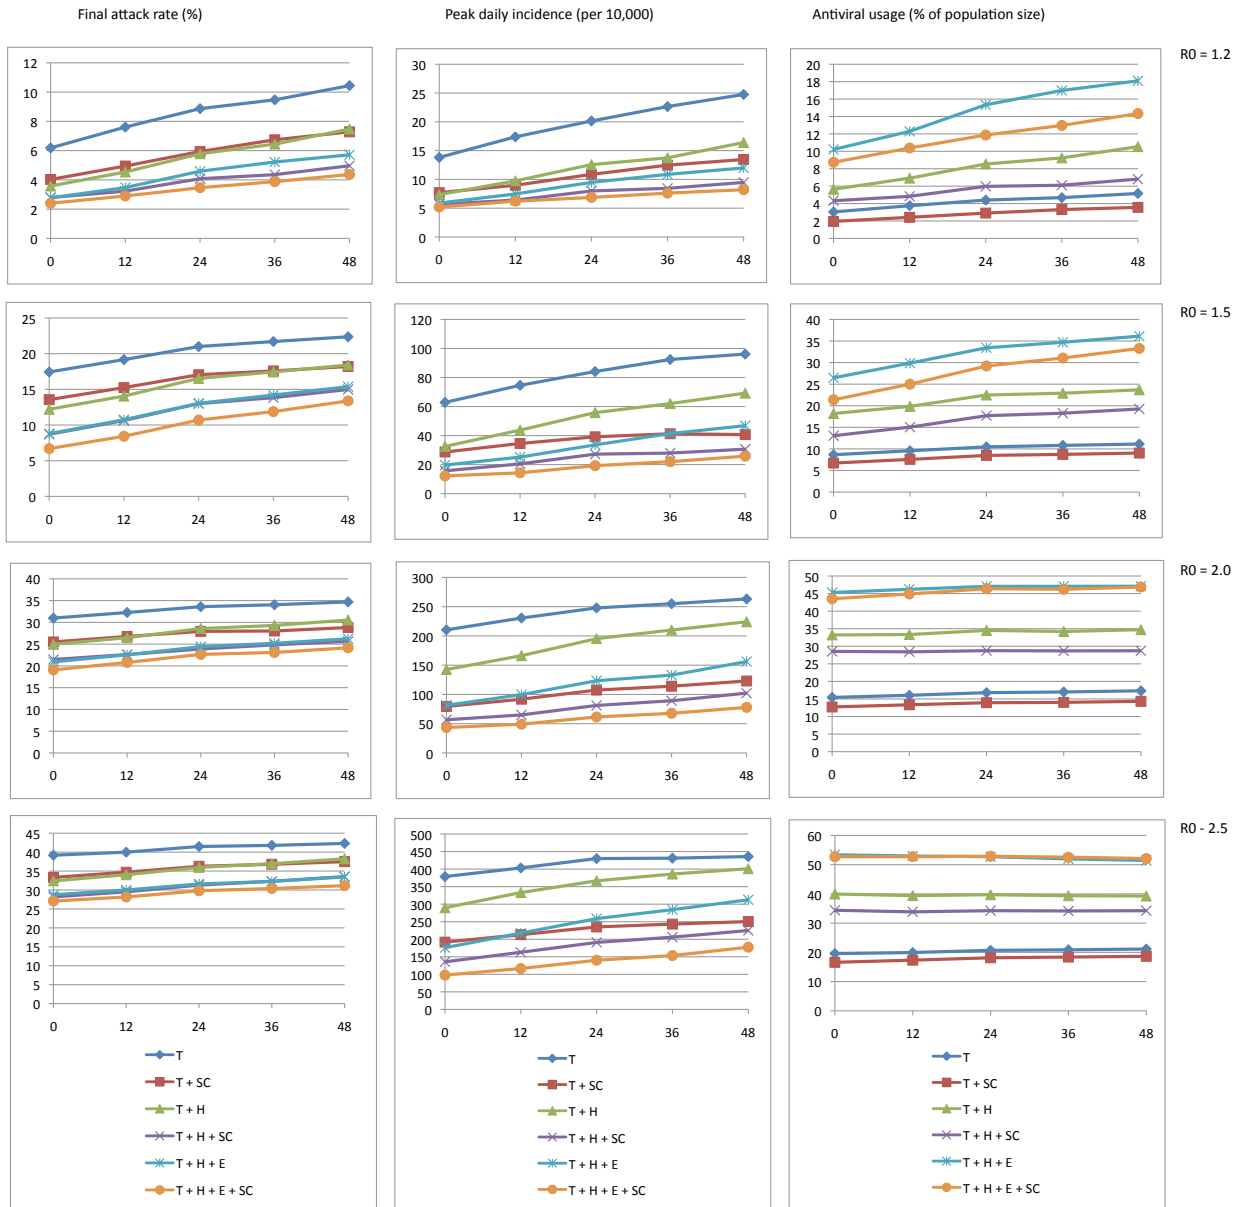

Supplement: pone.0013797.s003.pdf [file pone.0013797.s003.pdf]
